# Supplementary material
Source: PubMed Central journal article supplement (PMC548541)

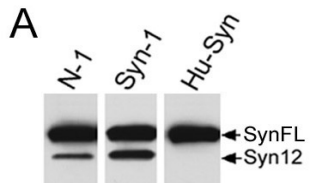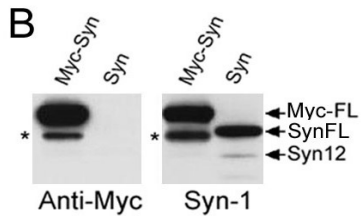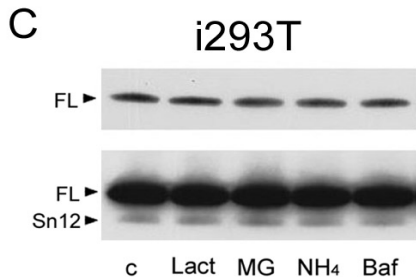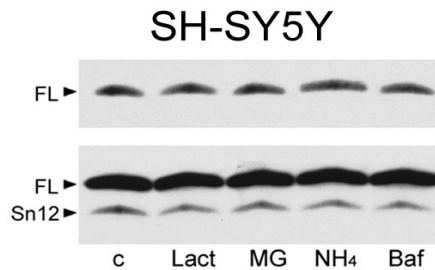

Supplement: pnas_102_6_2162__2.pdf [file pnas_102_6_2162__2.pdf]

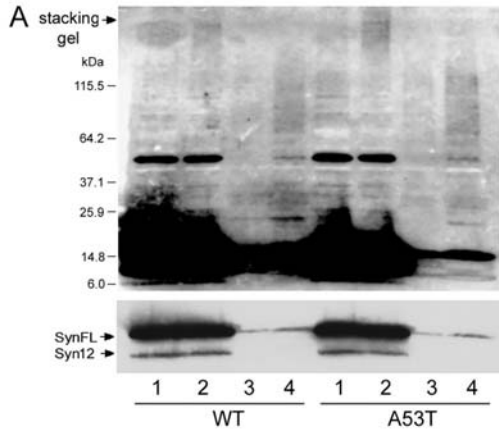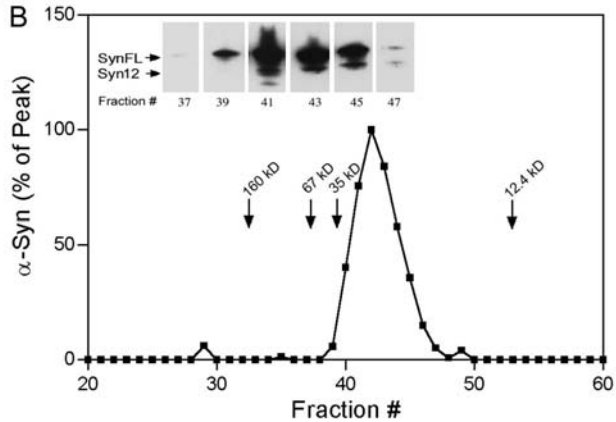

Supplement: pnas_102_6_2162__3.pdf [file pnas_102_6_2162__3.pdf]

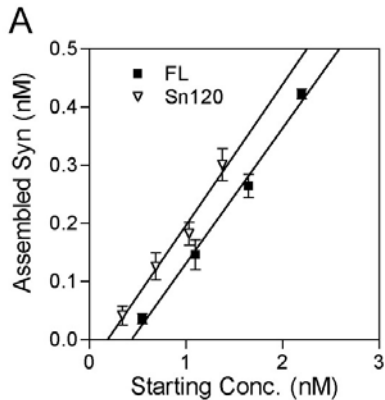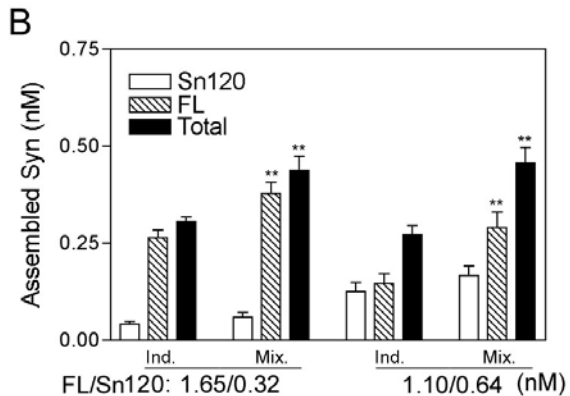

Supplement: pnas_102_6_2162__4.pdf [file pnas_102_6_2162__4.pdf]
